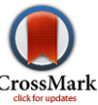

## Correction

# Correction: ChIP-seq and In Vivo Transcriptome Analyses of the *Aspergillus fumigatus* SREBP SrbA Reveals a New Regulator of the Fungal Hypoxia Response and Virulence

The *PLOS Pathogens* Staff

## Notice of Republication

This article was republished on November 10, 2014, to correct errors in the online version only. The two affiliations for the second author, Bridget M. Barker, were omitted. These are now correct in the online version and are the following:

Department of Microbiology and Immunology, Montana State University, Bozeman, Montana, United States of America

Current address: Pathogen Genomics Division, Translational Genomics Institute and Northern Arizona University, Flagstaff, Arizona, United States of America

There was no correction necessary to the PDF version.

## Reference

1. Chung D, Barker BM, Carey CC, Merriman B, Werner ER, et al. (2014) ChIP-seq and In Vivo Transcriptome Analyses of the *Aspergillus fumigatus* SREBP SrbA Reveals a New Regulator of the Fungal Hypoxia Response and Virulence. *PLoS Pathog* 10(11): e1004487. doi:10.1371/journal.ppat.1004487

**Citation:** The *PLOS Pathogens* Staff (2014) Correction: ChIP-seq and In Vivo Transcriptome Analyses of the *Aspergillus fumigatus* SREBP SrbA Reveals a New Regulator of the Fungal Hypoxia Response and Virulence. *PLoS Pathog* 10(11): e1004576. doi:10.1371/journal.ppat.1004576

**Published:** November 24, 2014

**Copyright:** © 2014 The *PLOS Pathogens* Staff. This is an open-access article distributed under the terms of the Creative Commons Attribution License, which permits unrestricted use, distribution, and reproduction in any medium, provided the original author and source are credited.
